# Supplementary material for: Destabilized reporters for background-subtracted, chemically-gated, and multiplexed deep-tissue imaging
Source: Royal Society of Chemistry journal article supplement (doi:10.1039/d4sc00377b), 2024-01-01
Supplement: d4sc00377b1.pdf [file d4sc00377b1.pdf]

## SUPPORTING INFORMATION

### **Destabilized reporters for background-subtracted, chemically-gated, and multiplexed deep-tissue imaging**

Jason Yun<sup>1#</sup>, Yimeng Huang<sup>1#</sup>, Austin D.C. Miller<sup>2</sup>, Brandon L. Chang<sup>3</sup>, Logan Baldini<sup>4</sup>, Kaamini M. Dhanabalan<sup>4</sup>, Eugene Li<sup>4</sup>, Honghao Li<sup>1</sup>, Arnab Mukherjee<sup>\*1,2,4</sup>

Affiliations:

<sup>1</sup>Department of Chemistry, University of California, Santa Barbara, CA 93106, USA

<sup>2</sup>Biomolecular Science and Engineering Graduate Program, University of California, Santa Barbara, CA 93106, USA

<sup>3</sup>Department of Molecular, Cell, and Developmental Biology, University of California, Santa Barbara, CA 93106, USA

<sup>4</sup>Department of Chemical Engineering, University of California, Santa Barbara, CA 93106, USA

# denotes equal contribution

\*Correspondence should be addressed to AM ([arnabm@ucsb.edu](mailto:arnabm@ucsb.edu))

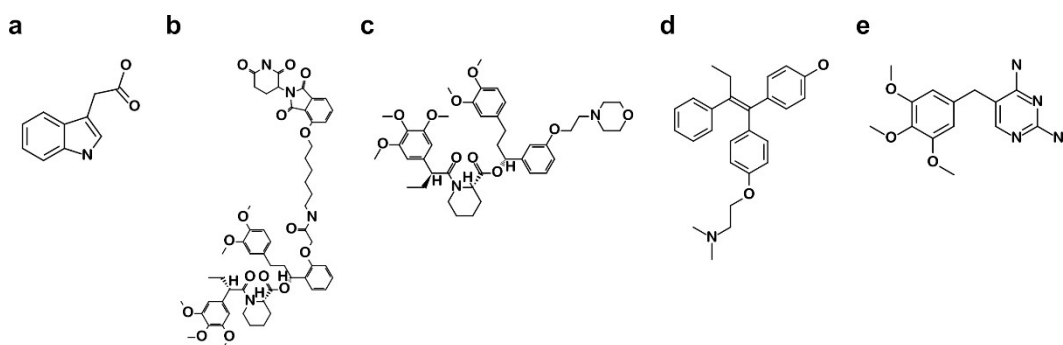

**Supplementary figure 1. Chemical structures of the ligands tested for Aqp1 modulation.**

(a) indole-3-acetic acid, an auxin family hormone (b) dTAG-13, TAG-13, a heterobifunctional degrader that consists of an FKBP12<sup>F36V</sup> targeting synthetic ligand (known as AP1687) linked to a thalidomide moiety, which recruits the cereblon E3 ubiquitin ligase (c) shield-1, a morpholine-containing derivative of the FKBP12<sup>F36V</sup>-directed synthetic ligand, (d) 4-hydroxytamoxifen, and (e) trimethoprim. Indole-3-acetic acid and dTAG-13 are capable of inducing the degradation of protein targets that have been fused to degradation tags derived from IAA17 and FKBP12<sup>F36V</sup>, respectively. On the other hand, 4-hydroxytamoxifen and trimethoprim are capable of stabilizing protein targets that have been fused to destabilizing domains (DDs) derived from the estrogen receptor ligand-binding domain and *E. coli* dihydrofolate reductase (DHFR). Additionally, shield-1 can either induce the degradation of proteins that are fused to a modified FKBP12<sup>F36V</sup> domain comprising a 19-amino acid cryptic degron or stabilize proteins that are fused to a DD based on FKBP12<sup>F36V/L106P</sup> double mutant. Chemical structures were generated using PubChem Sketcher v2.4.

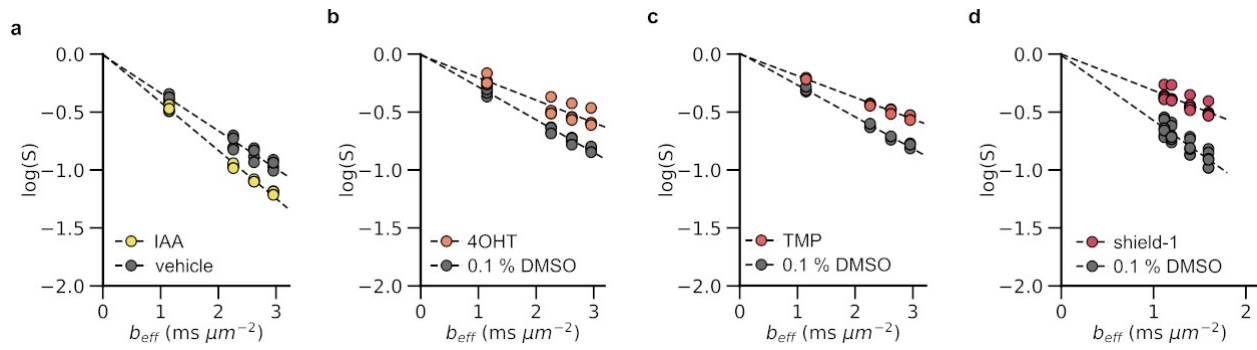

**Supplementary figure 2. Effect of ligand-dependent DDs on Aqp1 diffusivity.** Representative plots depicting the decrease in diffusion-weighted signal intensity as a function of the effective  $b$ -value in CHO cells engineered to express DDs based on: **(a)** truncated 68-amino acid form of the plant protein, IAA17 **(b)** estrogen receptor ligand-binding domain **(c)** *E. coli* dihydrofolate reductase **(d)** mammalian FKBP12<sup>F36V/L106P</sup>. Diffusion-weighted measurements were acquired in both the absence and presence of treatment with the respective degradation-inducing ligand: indole-3-acetic acid (IAA) or stabilizing ligands: 4-hydroxytamoxifen (4HT), trimethoprim (TMP), and shield-1.

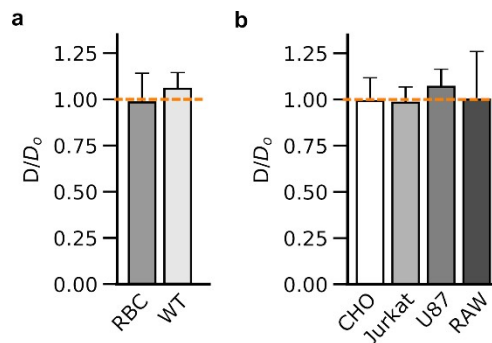

**Supplementary figure 3: Specificity of shield-1 modulation.** Fold-change in diffusivities ( $D/D_0$ ) of **(a)** red blood cells and native CHO cells **(b)** cells engineered to express DD-free Aqp1 and treated with shield-1 (1  $\mu$ M, 24-hours). Orange dashed line indicates no change relative to vehicle-treated controls. Error-bars represent the standard deviation ( $n = 4$ ). Unpaired, 2-sided t-test revealed no significant differences in diffusivities between untreated cells and cells treated with 1  $\mu$ M shield-1 for 24-hours ( $P > 0.05$ ).

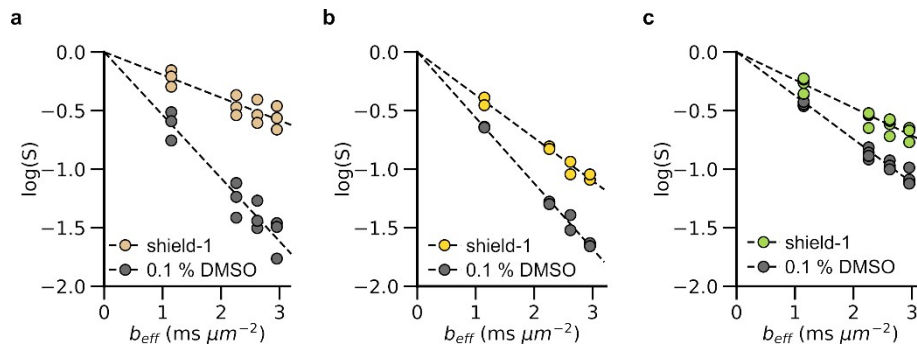

**Supplementary figure 4. Biochemical modulation of Aqp1-FKBP12-DD in various cell lines.**

Representative plot showing the decrease in diffusion-weighted signal intensity as a function of the effective b-value in (a) Jurkat (b) U87 and (c) RAW cells engineered to express Aqp1-FKBP12-DD. Diffusion-weighted measurements were acquired in both the absence and presence of 24-hour treatment with 1  $\mu$ M shield-1.

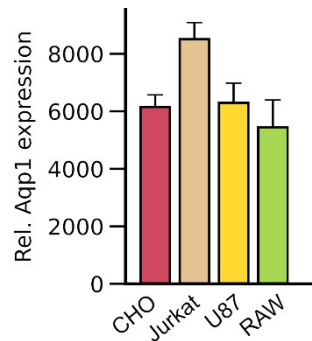

**Supplementary figure 5. Expression of the Aqp1-FKBP12-DD transgene.**

Aqp1-FKBP12-DD expression was assayed by qRT-PCR using a forward primer that binds to the FLAG epitope sequence incorporated at the N-terminus of Aqp1. Actin was used as the housekeeping gene and relative Aqp1 expression was quantified using the  $2^{-\Delta\Delta C_q}$  method. Error bars represent the standard deviation. One-way ANOVA followed by Tukey's HSD test revealed no significant differences in gene expression among the four cell types ( $n = 3$ ,  $P > 0.05$ ).

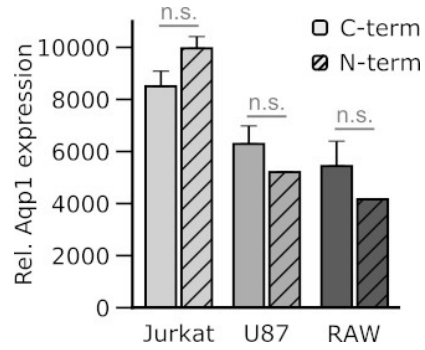

**Supplementary figure 6. Expression of Aqp1 harboring FKBP12-DD.** The expression of the FKBP12-DD-Aqp1 and Aqp1-FKBP12-DD transgenes was assayed by qRT-PCR using primers that bind to the FLAG epitope incorporated respectively at the C or N-terminus of Aqp1. Actin was used as the housekeeping gene and relative Aqp1 expression was quantified using the  $2^{-\Delta\Delta C_q}$  method. Error bars represent the standard deviation. Unpaired, 2-sided t-test revealed no significant (n.s.) differences in transgene expression between cells expressing Aqp1 harboring either N or C-terminal fusions of FKBP12-DD ( $P > 0.05$ ).

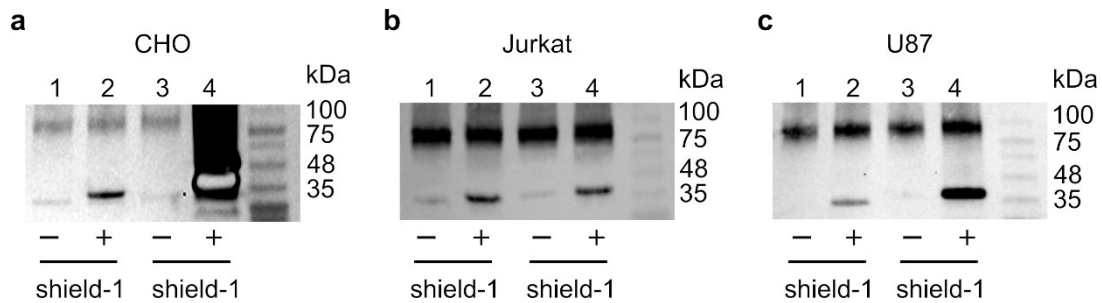

**Supplementary figure 7. Western blotting to detect Aqp1-FKBP12-DD expression.** Lysates were prepared from cells stably transduced to express Aqp1 harboring FKBP12-DD at either the C or N-terminus. Aqp1 expression was probed by immunostaining using an anti-FLAG antibody in (a) CHO (b) Jurkat and (c) U87 cells. Lanes 1 & 2 contain membrane fractions from cells expressing Aqp1 harboring FKBP12-DD at the C-terminus. Lanes 3 & 4 contain membrane extracts from cells expressing Aqp1 harboring FKBP12-DD at the N-terminus. The Na<sup>+</sup>/K<sup>+</sup>-ATPase pump (100 kDa) served as a loading control. The detection of FKBP12-DD-Aqp1 in

membrane extracts prepared from CHO cells proved to be challenging, as immunoblotting consistently led to the appearance of smeared bands.

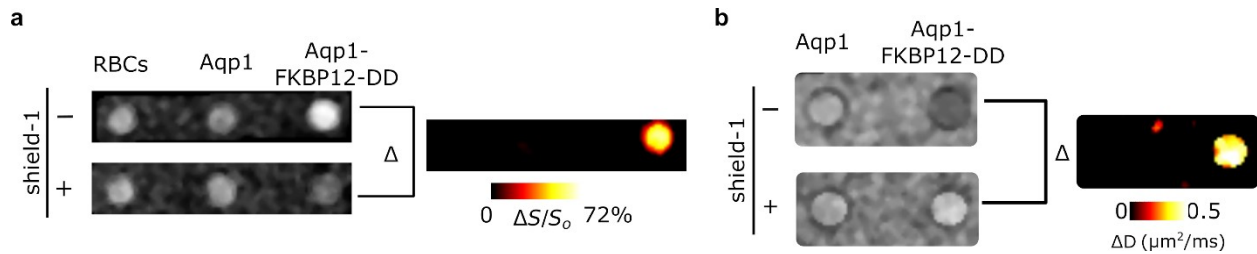

**Supplementary figure 8. Differential imaging through shield-1 modulation. (a)** Images of red blood cells and CHO cells expressing DD-free Aqp1 and Aqp1-FKBP12-DD that have undergone background subtraction. The difference image was produced by subtracting voxel-wise diffusion-weighted datasets acquired with and without shield-1 incubation, denoising the resulting image using a median filter, and displaying it as a pseudo colored "hotspot." **(b)** Diffusion maps of CHO cells expressing DD-free Aqp1 and Aqp1-FKBP12-DD that have undergone background subtraction. The difference map was produced by subtracting voxel-wise diffusivity values measured with and without shield-1 incubation, denoising the resulting image using a median filter, and displaying it in pseudo color.

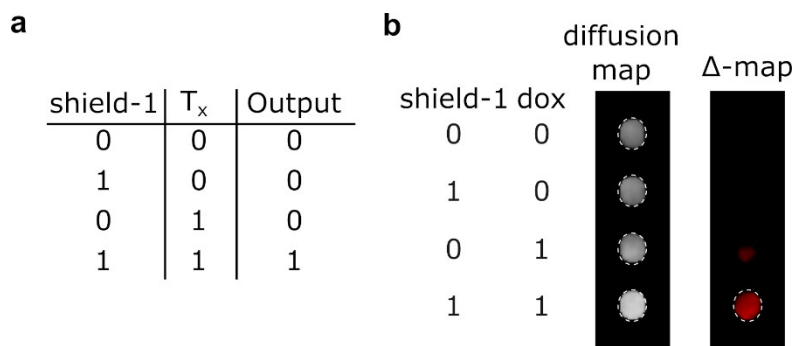

**Supplementary figure 9. Biochemically-gated imaging of transcriptional activity. (a)** Truth table for shield-1 gated imaging of promoter activity using Aqp1-FKBP12-DD.  $T_x$  represents the transcriptional activity induced by doxycycline (dox). **(b)** Difference map showing shield-1 gated imaging of promoter activity. The difference map was obtained through voxel-wise subtraction of

diffusivity values acquired in the presence of shield-1, doxycycline, or both from the diffusivity values measured in their absence. The resulting dataset was subsequently denoised using a median filter and presented as a pseudo-colored "hotspot."

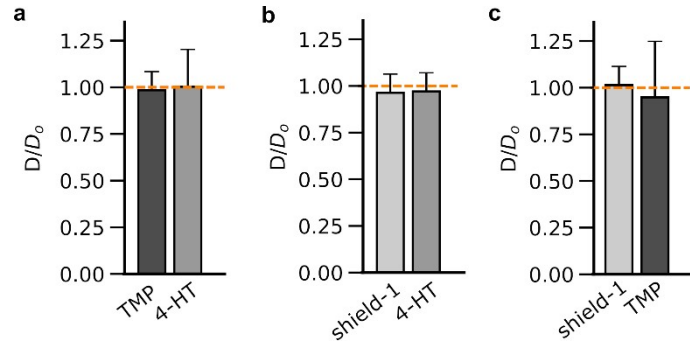

**Supplementary figure 10: Aqp1-DDs are mutually orthogonal.** Fold-change in the diffusion coefficients of (a) Aqp1-FKBP12-DD (b) Aqp1-DHFR-DD, and (c) Aqp1-ER-DD following treatment with respective non-cognate ligands, including trimethoprim (TMP) or 4-hydroxytamoxifen (4HT), and shield-1. Orange dashed lines indicate no change relative to vehicle-treated controls, viz.  $D/D_0 = 1$ . Unpaired, 2-sided t-test revealed no significant differences in diffusivities between untreated and ligand-treated cells ( $P > 0.05$ ).

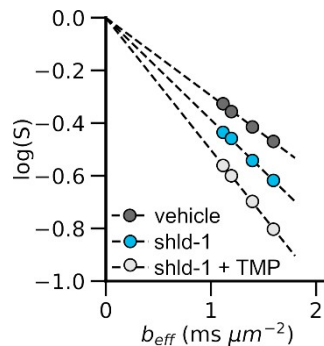

**Supplementary figure 11. Biochemical modulation of Aqp1-DDs in mixed-cells.** Representative plot showing the decrease in diffusion-weighted signal intensity as a function of the effective b-value in a 1:1 mixture of CHO cell labeled with Aqp1-FKBP12-DD and Aqp1-DHFR-DD. Diffusion-weighted measurements were acquired in both the absence of any ligand and following 24-hour treatment with shield-1 and both shield-1 + trimethoprim.

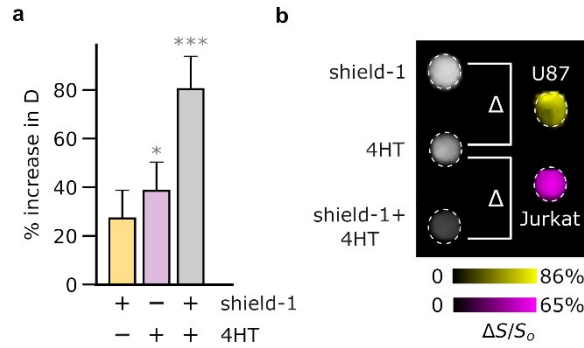

**Supplementary figure 12: Biochemical unmixing of Aqp1-DDs for multiplex imaging. (a)**

Ligand-dependent increase in the diffusivity of a mixed population comprising U87 and Jurkat cells transduced respectively with Aqp1-FKBP12-DD and Aqp1-ER-DD transgenic reporters. Ligand addition permits the modulation of diffusivity in a stepwise manner by stabilizing one or both Aqp1-DD constructs. **(b)** The components of the mixed cell population were resolved through difference imaging. Subtraction of diffusion-weighted images of untreated cells from images acquired after treatment with shield-1 reveals the U87 population. Subtraction of diffusion-weighted images of shield-1 treated cells from those obtained after treatment with both shield-1 + 4-hydroxytamoxifen (4HT) revealed the Jurkat population. The images were denoised by median filtering and pseudo-colored to distinguish the two sub-populations. Error bars represent standard deviation ( $n = 6$ ).  $P$ -values were computed using one-way ANOVA followed by Tukey's HSD test. \* denotes  $P < 0.05$ , \*\*\* denotes  $P < 0.001$

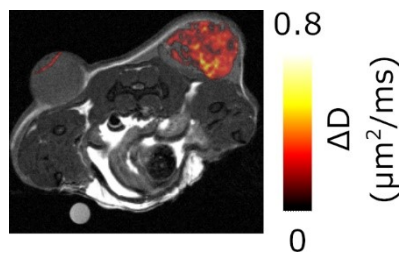

**Supplementary figure 13. In vivo imaging using background subtraction.** Background subtracted diffusion maps of transgenic tumors engineered to express Aqp1-FKBP12-DD or DD-free Aqp1. The difference map was generated by subtracting voxel-wise tumor diffusivity datasets



acquired before and after intraperitoneal injection of shield-1 (10 mg/kg). This difference map was then overlaid on an anatomical image to provide spatial context.

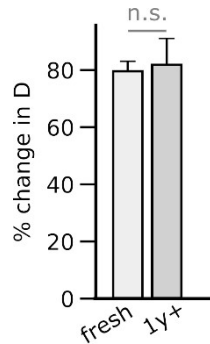

**Supplementary figure 14. Longevity of reporter transgene activity.** Shield-1-driven changes in the diffusivity of CHO cells transduced to express Aqp1-FKBP12-DD were acquired within 1-2 weeks of transduction and more than a year after initial transduction. Error bars denote standard deviation ( $n = 4-6$ ). Unpaired, 2-sided t-test revealed no significant differences in shield-1 triggered diffusivity changes between the two cell batches ( $P > 0.05$ ).

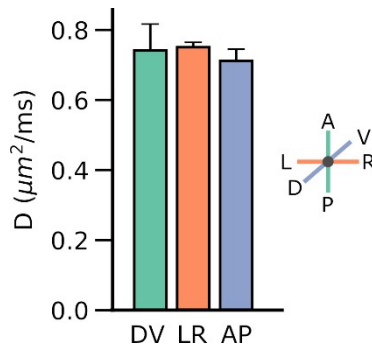

**Supplementary figure 15. Effect of varying diffusion-weighting direction on Aqp1-driven diffusivity.** Diffusivities of CHO cells engineered to express Aqp1 acquired in the 3 primary axes of our vertical-bore MRI: dorsal-ventral (DV), left-right (LR), and anterior-posterior (AP). Axial slices of cell pellets are acquired along the AP axis. One-way ANOVA followed by Tukey's HSD test revealed no significant differences in diffusivities between the three cardinal directions ( $n = 3$ ,  $P > 0.05$ ).

**Table S1. Plasmids engineered and used in this study.**

| Plasmid | Main constructs encoded                     | Notes                                                                                                                                  |
|---------|---------------------------------------------|----------------------------------------------------------------------------------------------------------------------------------------|
| pJY22   | Flag-Aqp1-IRES-EGFP                         | Constitutive expression of degron-free Aqp1 from the EF1 $\alpha$ promoter                                                             |
| pJY02   | Flag-Aqp1-IAA17-IRES-EGFP                   | Expresses Aqp1 tagged to the auxin-inducible degron (AID) based on full-length IAA17 (228 amino acids)                                 |
| pJY09   | OsTIR1-IRES-mCherry                         | Constitutive expression of OsTIR1, an auxin receptor F-box protein that is needed to activate AID by recruiting E3 ubiquitin ligase    |
| pJY19   | Flag-Aqp1-IAA17 <sup>trunc</sup> -IRES-EGFP | Expresses Aqp1 tagged to truncated AID based on a 68-amino acid segment of IAA17                                                       |
| pJY18   | AtFB2-IRES-mCherry                          | Constitutive expression of AtFB2, an auxin receptor F-box protein needed to activate truncated IAA17 by recruiting E3 ubiquitin ligase |
| pJY1    | Flag-Aqp1-DHFR-DD-IRES-EGFP                 | Inducible expression of Aqp1-DHFR-DD from the minimal CMV promoter                                                                     |
| pJY20   | Flag-Aqp1-DHFR-IRES-EGFP                    | Constitutive expression of Aqp1-DHFR-DD from the EF1 $\alpha$ promoter                                                                 |
| pJY10   | Flag-Aqp1-ER-IRES-EGFP                      | Inducible expression of Aqp1-ER-DD from the minimal CMV promoter                                                                       |

|             |                             |                                                                                                                |
|-------------|-----------------------------|----------------------------------------------------------------------------------------------------------------|
| pJY21       | Flag-Aqp1-ER-IRES-EGFP      | Constitutive expression of Aqp1-ER-DD, from the EF1 $\alpha$ promoter                                          |
| pJY12       | Flag-Aqp1-FKBP12-IRES-EGFP  | Inducible expression of Aqp1-FKBP12-DD from the minimal CMV promoter                                           |
| pJY23       | Flag-Aqp1-FKBP12-IRES-EGFP  | Constitutive expression of Aqp1-FKBP12-DD from the EF1 $\alpha$ promoter                                       |
| pJY24       | Flag-FKBP12-Aqp1 -IRES-EGFP | Inducible expression of FKBP12-DD-Aqp1 (i.e. N-terminal tagged) from the minimal CMV promoter                  |
| pJY25       | Flag-FKBP12-Aqp1 -IRES-EGFP | Constitutive expression of FKBP12-DD-Aqp1 (i.e. N-terminal tagged) from the EF1 $\alpha$ promoter              |
| pJY00       | Flag-Aqp1-IRES-EGFP         | Inducible expression of degron-free Aqp1 from the minimal CMV promoter                                         |
| pJY23_flag7 | Aqp1(flag)-FKBP12-IRES-EGFP | Constitutive expression of Aqp1 with an internal FLAG tag (between Q43 and T44) from the EF1 $\alpha$ promoter |
| pPackaging  |                             | Expresses proteins for lentiviral packaging                                                                    |
| pVSV-G      |                             | Expresses the VSV-G protein for broad lentiviral tropism                                                       |

**Table S2:** Oligonucleotide primers for qRT-PCR

| <b>Primers/gene</b> | <b>Sequence</b>        |
|---------------------|------------------------|
| Aqp1_nFLAG_F        | TGGACTACAAGGACGACGAC   |
| Aqp1_nFLAG_R        | CACCTTCACGTTGTCCTGGA   |
| Aqp1_cFLAG_F        | TCTACGACTTCATCCTGGCC   |
| Aqp1_cFLAG_R        | CGTCGTCGTCCTTGTAGTCT   |
| CgACTB_F            | CCCCATTGAACACGGCATTG   |
| CgCTB_R             | AGGTCTCAAACATGATCTGGGT |
| HsACTB_F            | TTGGCAATGAGCGGTTCC     |
| HsACTB_R            | GTTGAAGGTAGTTTCGTGGATG |
